# Supplementary material for: Genome-wide identification and expression analysis of bHLH gene family revealed their potential roles in abiotic stress response, anthocyanin biosynthesis and trichome formation in Glycyrrhiza uralensis
Source: Front Plant Sci. 2025 Jan 21;15:1485757. doi: 10.3389/fpls.2024.1485757 (PMC11790457; doi:10.3389/fpls.2024.1485757)
Supplement: Supplementary file 13 [file Table12.xlsx]

## Sheet: Sheet1
	PEG_CK	PEG_2 h	PEG_6 h	PEG_12 h
GubHLH1	17.3167	10.72	16.6967	28.2367
GubHLH2	0.39	0.1733	0.0733	0.3333
GubHLH3	0	0	0	0
GubHLH4	0	0	0	0
GubHLH5	9.6733	16.4267	15.43	22.2667
GubHLH6	4.1367	6.07	6.09	8.7567
GubHLH7	4.1367	6.07	6.09	8.7567
GubHLH8	2.6967	1.9033	1.1833	1.6567
GubHLH9	0.26	0.91	1.3267	5.1167
GubHLH10	15.5733	12.5833	16.8933	15.12
GubHLH11	48.88	29.3167	71.3667	95.3267
GubHLH12	49.89	54.37	63.47	66.2667
GubHLH13	9.62	4.2633	4.29	6.75
GubHLH14	1.1533	0.9833	1.0167	0.4
GubHLH15	0.2933	0.5733	0.9667	0.5233
GubHLH16	97.1233	59.2767	87.8867	120.193
GubHLH17	26.6733	21.68	23.18	31.58
GubHLH18	19.4633	17.3	19.1133	20.25
GubHLH19	1.1167	0	0	0
GubHLH20	0.0533	0.5567	0.23	0.0967
GubHLH21	10.5933	8.4367	8.0067	10.7733
GubHLH22	1.38	1.0833	0.88	0.9067
GubHLH23	4.1333	2.7333	3.2433	3.9533
GubHLH24	0	0	0	0
GubHLH25	94.3867	74.98	99.8467	103.543
GubHLH26	3.9633	2.2967	3.4	1.9367
GubHLH27	0.31	0.75	0.5067	0.36
GubHLH28	47.4433	70.25	85.1267	95.33
GubHLH29	0	0	0	0
GubHLH30	0.5333	0.4267	0.29	1.0267
GubHLH31	0.2767	0.0333	0	0.0633
GubHLH32	15.18	5.7367	13.5967	10.1667
GubHLH33	0.1433	0.0267	0	0
GubHLH34	19.72	7.3167	12.4233	13.6633
GubHLH35	0.3267	0.0267	0.0133	0.0133
GubHLH36	5.4667	2.97	4.46	3.3433
GubHLH37	16.3733	8.7033	19.8633	11.1433
GubHLH38	0.2633	0.1967	0.23	0.05
GubHLH39	109.42	64.62	102.49	123.093
GubHLH40	1.1967	6.88	3.29	2.5567
GubHLH41	74.57	39.93	45.9333	54.0733
GubHLH42	24.4733	15.1533	40.7133	42.2867
GubHLH43	1.35	1.16	0.2733	0.86
GubHLH44	16.2067	11.79	13.19	9.11
GubHLH45	47.1933	35.8867	60.28	58.92
GubHLH46	0.66	3.9033	1.6	2.5233
GubHLH47	0.0167	0.8467	0.5067	0.0733
GubHLH48	0.4967	0.1267	0.35	0.1767
GubHLH49	2.2933	3.4367	4.3933	7.35
GubHLH50	0.0833	0.1133	0.03	0
GubHLH51	0	0.1567	0	0.0767
GubHLH52	42.68	34.8767	43.6	39.3533
GubHLH53	3.2933	1.71	2.48	1.9033
GubHLH54	5.6033	3.56	6.91	8.9967
GubHLH55	18.2333	12.23	10.3267	19.21
GubHLH56	1.73	1.4133	4.6733	21.9367
GubHLH57	0	0	0	0
GubHLH58	0.25	0.7133	0.45	0.1433
GubHLH59	1.2367	0.43	0.8633	0.8933
GubHLH60	0.56	9.7467	1.72	0.6933
GubHLH61	0.04	0.01	0	0.03
GubHLH62	32.65	16.2433	33.96	36.7833
GubHLH63	0.1433	0.0267	0	0
GubHLH64	0.9433	2.9167	1.6333	3.93
GubHLH65	0.7433	0.2467	0.35	0.89
GubHLH66	0.11	0.06	0.02	0.05
GubHLH67	52.5067	37.5367	51.7433	49.8133
GubHLH68	0.5467	0.26	0.18	0.38
GubHLH69	0	0.54	0	0
GubHLH70	72.0067	53.2133	62.3633	58.7333
GubHLH71	0	0	0	0
GubHLH72	19.4467	13.5533	20.9	13.5733
GubHLH73	1.5067	3.4933	5.4733	10.82
GubHLH74	22.0933	5.36	18.6567	20.6933
GubHLH75	11.8167	17.19	16.6033	9.8067
GubHLH76	13.5233	9.7767	13.48	10.69
GubHLH77	0.2733	0.2567	0.43	0.15
GubHLH78	2.24	57.0167	4.4033	10.7733
GubHLH79	0	0	0	0
GubHLH80	12.9167	61.8733	17.68	34.7633
GubHLH81	12.9167	61.8733	17.68	34.7633
GubHLH82	12.9167	61.8733	17.68	34.7633
GubHLH83	0	0	0.2233	0.53
GubHLH84	21.55	11.7167	18.3233	17.9767
GubHLH85	85.8733	69.0133	104.027	125.867
GubHLH86	86.7967	113.673	120.477	163.73
GubHLH87	10.9367	6.1033	7.0967	7.17
GubHLH88	0	0	0	0
GubHLH89	52.2033	41.8567	54.22	53.63
GubHLH90	23.9333	14.3633	26.85	26.0533
GubHLH91	1.4033	0.5133	0.6233	1.44
GubHLH92	42.68	34.8767	43.6	39.3533
GubHLH93	5.0033	7.1967	10.8367	7.0667
GubHLH94	36.63	33.61	80.86	103.893
GubHLH95	0	0	0.03	0
GubHLH96	2.5633	1.3867	4.7667	4.26
GubHLH97	0.16	0.3967	0.4233	0.12
GubHLH98	0	0	0	0.52
GubHLH99	0	0	0	0.04
GubHLH100	19.4467	40.69	53.5133	27.9533
GubHLH101	17.1767	15.5267	18.98	23.06
GubHLH102	0.2033	1.3367	0.87	0.1733
GubHLH103	5.1	20.95	9.1567	6.5933
GubHLH104	1.0433	2.8033	0.23	0.0767
GubHLH105	1.0433	2.8033	0.23	0.0767
GubHLH106	0	0	0	0
GubHLH107	4.36	4.2467	4.6233	3.9467
GubHLH108	7.58	10.3	9.0433	8.09
GubHLH109	1.1967	6.88	3.29	2.5567
GubHLH110	0.47	1.3767	0.3933	1.1733
GubHLH111	0.04	0.0367	0.11	0.1767
GubHLH112	11.3933	25.0267	25.5	31.9233
GubHLH113	6.58	8.2767	9.9533	11.26
GubHLH114	0	0	0	0
GubHLH115	0	0	0	0
GubHLH116	40.9167	140.123	69.25	41.3533
GubHLH117	0.0133	0.49	0.1533	0
GubHLH118	0.23	0.2133	0.05	0.1933
GubHLH119	0	0.34	0.1167	0.0933
GubHLH120	0.03	0.19	0.7367	0.09
GubHLH121	0	0.13	0	0
GubHLH122	0.4167	0.15	0.6767	0.34
GubHLH123	13.9833	4.5867	16.4367	11.3533
GubHLH124	29.8567	157.543	35.38	27.11
GubHLH125	29.8567	157.543	35.38	27.11
GubHLH126	0.0967	0.9067	0.35	0.34
GubHLH127	9.2367	8.5033	12.5733	7.2533
GubHLH128	80.64	83.1167	89.77	94.54
GubHLH129	7.3533	7.4767	6.5533	7.7333
GubHLH130	0	0	0	0
GubHLH131	0	0.0267	0	0
GubHLH132	0.0833	0.0733	0.1067	0.07
GubHLH133	0	0	0	0
GubHLH134	2.8233	1.4167	3.03	3.2667
GubHLH135	16.37	18.07	18.01	16.1533
GubHLH136	0.7567	5.5733	3.3767	2.32
GubHLH137	2.0267	1.4333	1.2067	2.07
GubHLH138	5.6033	3.56	6.91	8.9967
GubHLH139	0.2667	0.3	0.2533	0.6633
